# Supplementary material
Source: PubMed Central journal article supplement (PMC6851320)
Supplement: supp_RA119.010126_154223_2_supp_401829_pysspp.pdf [file supp_RA119.010126_154223_2_supp_401829_pysspp.pdf]

## Supplementary Information

### The R882H DNMT3A hotspot mutation stabilizes the formation of large DNMT3A oligomers with low DNA methyltransferase activity

Tuong-Vi Nguyen<sup>1</sup>, Shihua Yao<sup>1</sup>, Yahong Wang<sup>2</sup>, Alan Rolfe<sup>1</sup>, Anand Selvaraj<sup>1</sup>, Rachel Darman<sup>1</sup>, Jiyuan Ke<sup>1</sup>, Markus Warmuth<sup>1</sup>, Peter G Smith<sup>1</sup>, Nicholas A Larsen<sup>1</sup>, Lihua Yu<sup>1</sup>, Ping Zhu<sup>1</sup>, Peter Fekkes<sup>1</sup>, Frédéric H Vaillancourt<sup>1</sup>, David M Bolduc<sup>1#</sup>

<sup>1</sup>H3 Biomedicine Inc, 300 Technology Square, Cambridge, MA 02139

<sup>2</sup>ChemPartner Co Ltd, 998 Halei Road, Shanghai, 201203, China

#Corresponding author: David Bolduc (david\_bolduc@h3biomedicine.com)

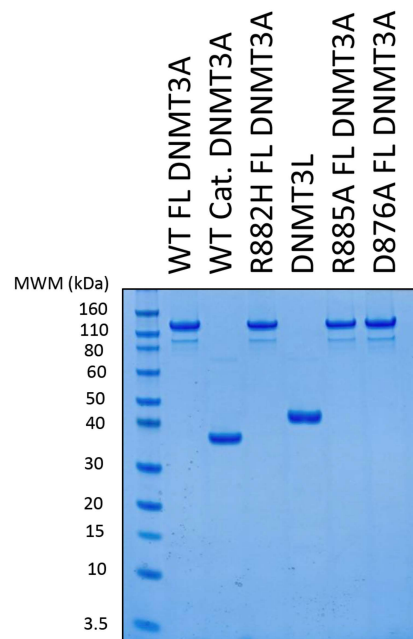

**Supplementary Figure 1: SDS-PAGE gel of DNMT3A and DNMT3L proteins used in this study.** All proteins were purified from *E. coli* as described in the Methods section. 2  $\mu$ g of each protein was run on a NuPAGE 4-12% Bis-Tris gel with Novex Prestained molecular weight marker and visualized by coomassie staining.

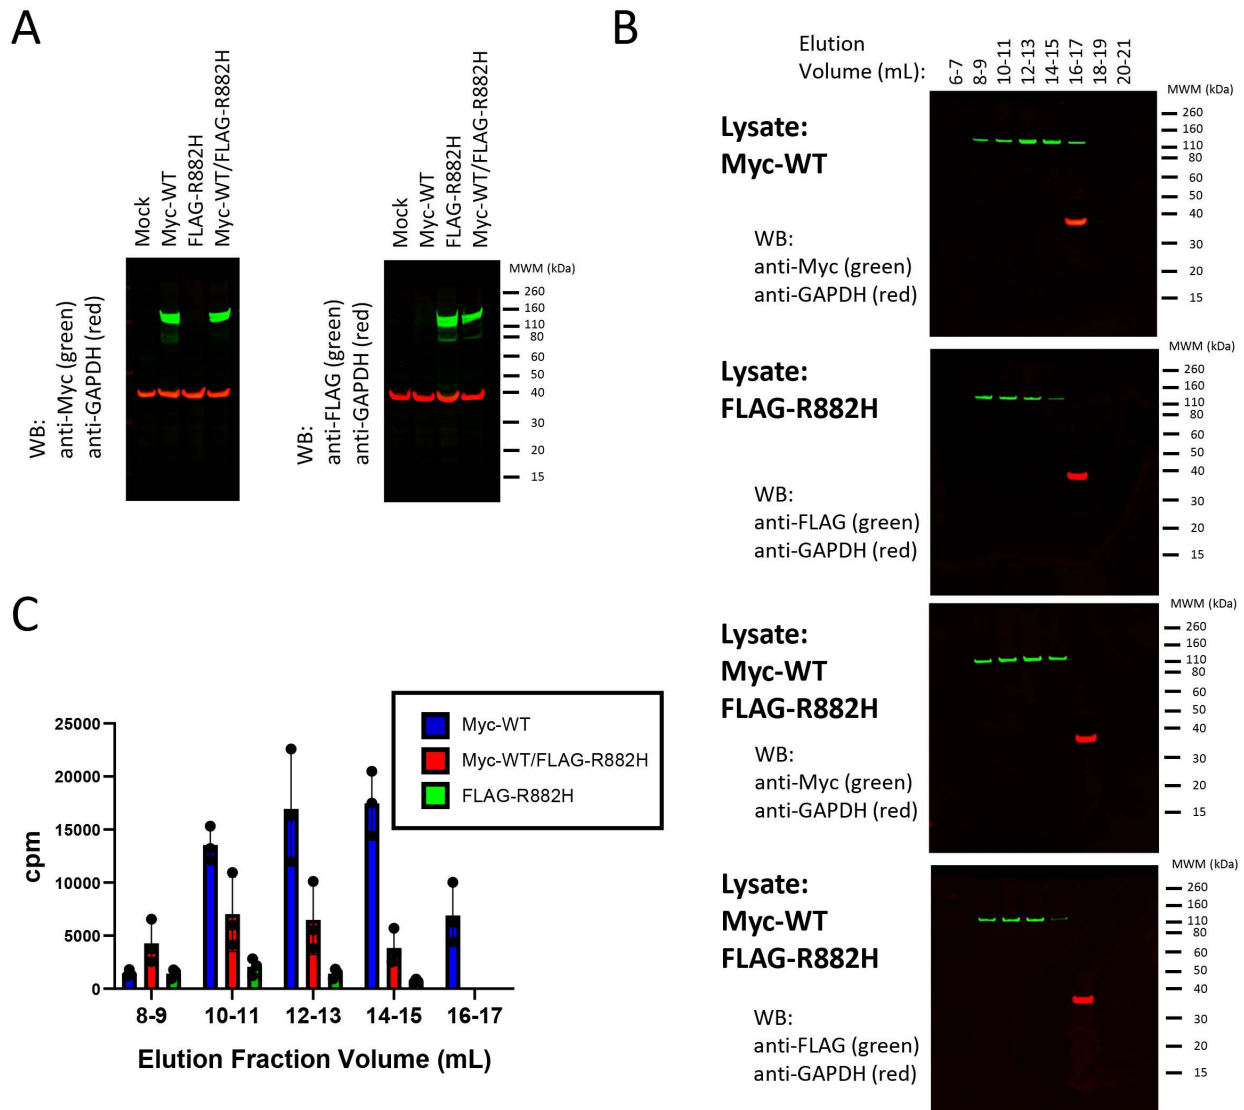

**Supplementary Figure 2: WT and R882H DNMT3A oligomer distribution and activity in HEK293 cell lysates.** A, Western blots of whole cell lysate of Myc-WT and FLAG-R882H DNMT3A transiently expressed alone or together in HEK293 cells. B, Western blots of SEC elution fractions from HEK293 cell lysates expressing Myc-WT alone, FLAG-R882H alone or Myc-WT and FLAG-R882H together. After exogenous expression of tagged DNMT3A proteins, HEK293 cells were lysed by Dounce homogenization and lysates passed over a Superose 6 size exclusion column. C, DNA methyltransferase activity of each

fraction containing DNMT3A from *B.* in the presence of 3  $\mu\text{M}$   $^3\text{H}$ -SAM and 10  $\mu\text{M}$  base pair DNA substrates. Error bars represent SD,  $n = 3$ .

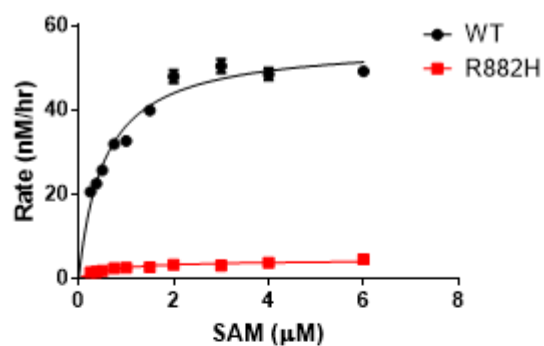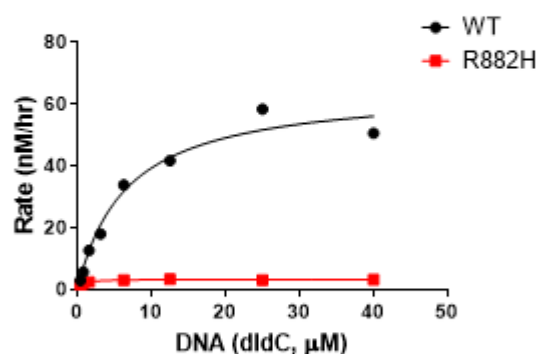

|       | dIdC app<br>$K_m$ ( $\mu\text{M}$ ) | SAM app<br>$K_m$ ( $\mu\text{M}$ ) | app $k_{cat}$<br>( $\text{hr}^{-1}$ ) | SAH $K_i$<br>( $\mu\text{M}$ ) |
|-------|-------------------------------------|------------------------------------|---------------------------------------|--------------------------------|
| WT    | 6.6 +/-<br>0.8                      | 0.55 +/-<br>0.04                   | 2.61 +/-<br>0.11                      | 0.18 +/-<br>0.05               |
| R882H | 0.49 +/-<br>0.04                    | 0.73 +/-<br>0.08                   | 0.13 +/-<br>0.01                      | 0.15 +/-<br>0.03               |

**Supplementary Figure 3. Apparent kinetic parameters of full length WT and R882H DNMT3A.** WT and R882H apparent  $K_m$  curves for SAM at 30  $\mu\text{M}$  dIdC. WT and R882H apparent  $K_m$  curves for dIdC DNA substrate at 5  $\mu\text{M}$  SAM. IC<sub>50</sub> curves for SAH inhibition of WT and R882H DNMT3A activity.  $K_i$  values for SAH were calculated using the Cheng-Prusoff equation. Table of apparent kinetic parameters measured for full length WT and R882H DNMT3A.

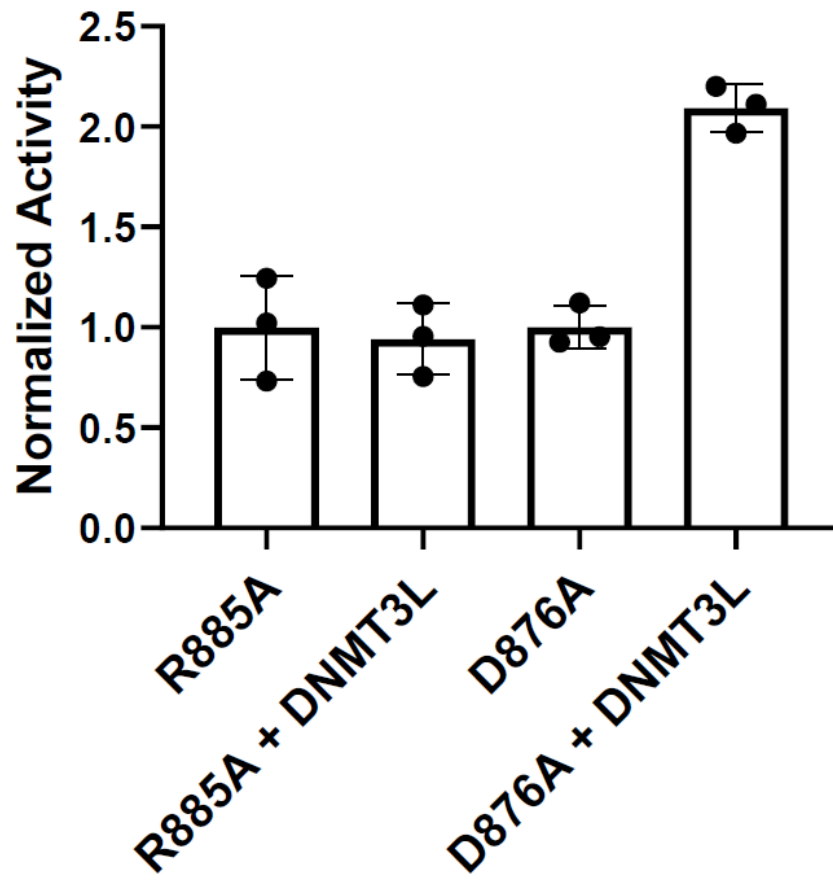

**Supplementary Figure 4. Activation of R885A and D876A by DNMT3L.** Methyltransferase activity of 200 nM R885A and 200 nM D876A DNMT3A alone and in the presence of an equal amount of DNMT3L after a 2 hr pre-incubation. Reactions were stopped after 4 hrs. Activity of R885A and D876A alone is normalized to 1. Error bars represent SD, n = 3.
